# Supplementary figures and images for: Subcellular Localization of Dystrophin Isoforms in Cardiomyocytes and Phenotypic Analysis of Dystrophin-deficient Mice Reveal Cardiac Myopathy is Predominantly Caused by a Deficiency in Full-length Dystrophin
Source: PubMed Central journal article supplement — Exp Anim. 2013 Aug 1;62(3):211–7. doi: 10.1538/expanim.62.211 (PMC4160940; doi:10.1538/expanim.62.211), 2013-08-01

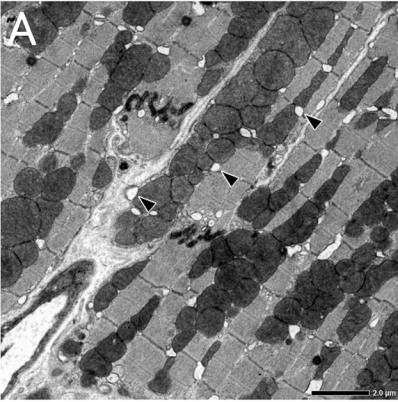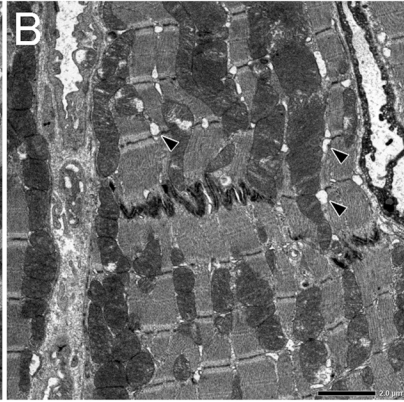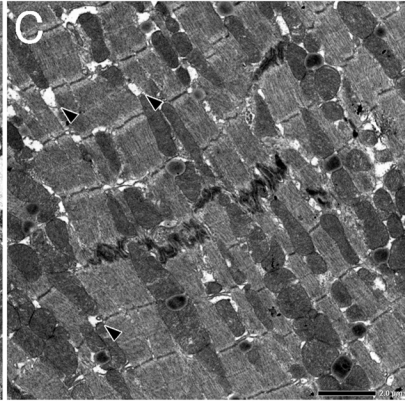

Supplement: expanim-62-211-s001.pdf [file expanim-62-211-s001.pdf]
